# Supplementary material for: Distance-based detection of paracetamol in microfluidic paper-based analytical devices for forensic application
Source: Royal Society of Chemistry journal article supplement (doi:10.1039/d3ay01739g), 2023-11-20
Supplement: d3ay01739g1.pdf [file d3ay01739g1.pdf]

**Electronic Supplementary Information for:**

**Distance-Based Detection of Paracetamol in Microfluidic Paper-Based**

**Analytical Devices for Forensic Application**

Nikaele S. Moreira,<sup>a</sup> Kemilly M. P. Pinheiro,<sup>a</sup> Lucas R. Sousa,<sup>a,b</sup> Gabriel D. S. Garcia,<sup>a</sup> Federico

Figueredo<sup>b</sup> e Wendell K. T. Coltro<sup>a,c</sup>

<sup>a</sup> *Instituto de Química, Universidade Federal de Goiás, 74690 - 900, Goiânia, GO, Brazil*

<sup>b</sup> *Laboratorio de Biosensores y Bioanálisis (LABB), Departamento de Química Biológica e IQUIBICEN' – CONICET, Facultad de Ciencias Exactas y Naturales, Universidad de Buenos Aires (UBA), Pabellón 2, Ciudad Universitaria, Ciudad Autónoma de Buenos Aires, Argentina*

<sup>c</sup> *Instituto Nacional de Ciência e Tecnologia de Bioanalítica, 13084-971, Campinas, SP, Brazil*

**\*Corresponding Author:**

Professor Wendell K. T. Coltro

Instituto de Química, Universidade Federal de Goiás

Campus Samambaia, 74690-900

Goiânia, GO, Brazil

Fax: +55 62 3521 1127

E-mail: [wendell@ufg.br](mailto:wendell@ufg.br)

**ORCID:** <http://orcid.org/0000-0002-4009-2291>

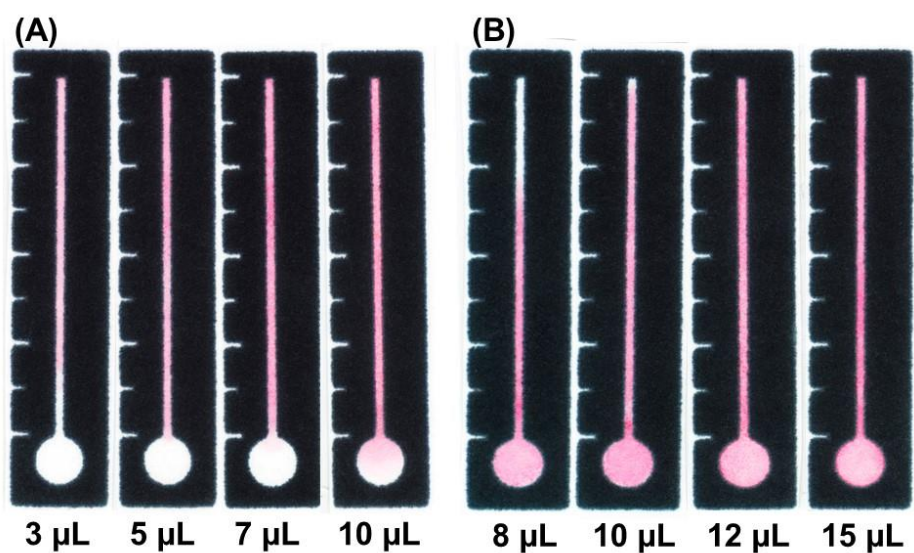

**Fig. S1** Optimization of solution volume to be used in  $\mu\text{PAD}$ . In (A), to verify the ideal volume to be added to saturate the  $\mu\text{PAD}$  channel, different volumes of red dye mixture containing 4% ethanol were added in the middle of the rectangular channel. In (B), to evaluate the ideal volume to fill the entire device, different volumes of red dye mixture containing 4% ethanol were added to the circular zone (sample zone) to fill the entire device (circular zone and rectangular channel).

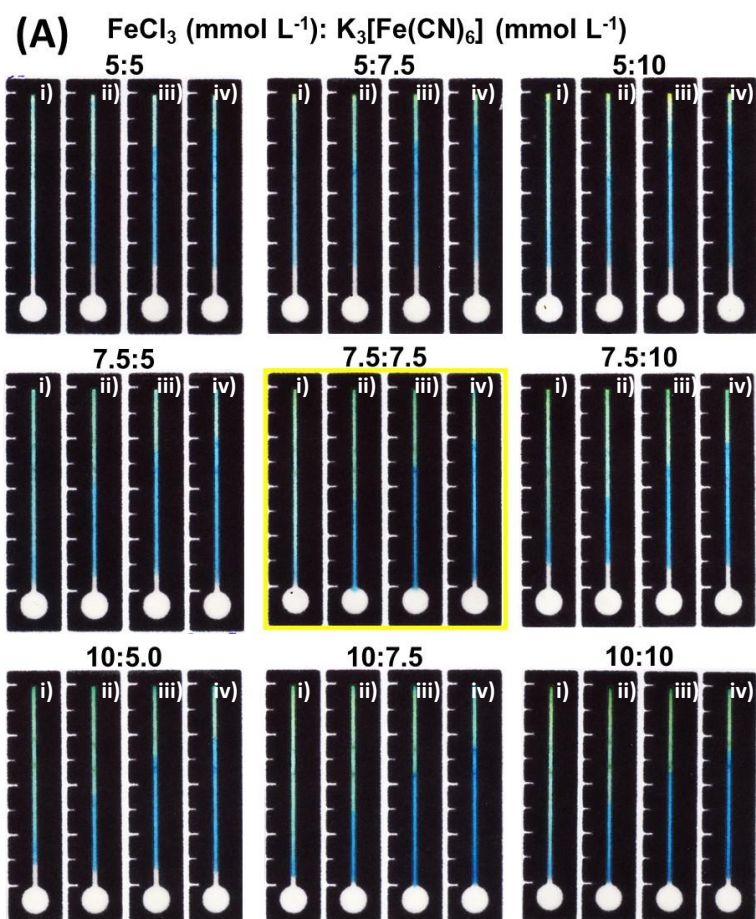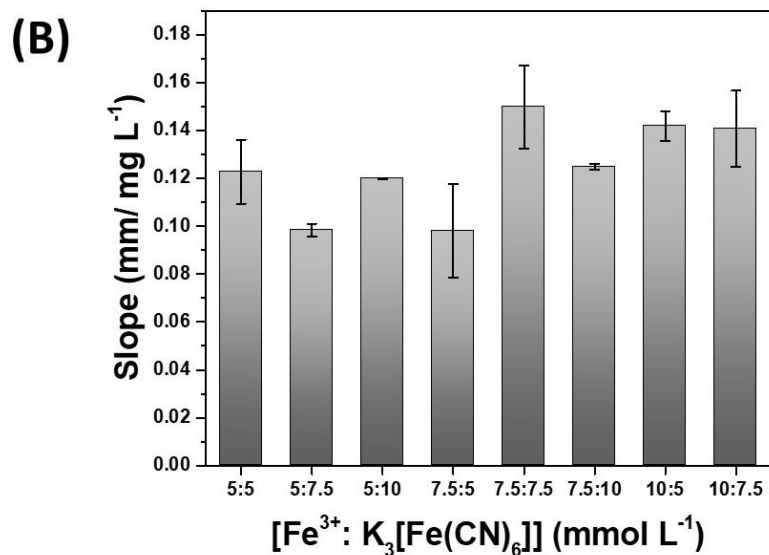

**Fig. S2** Optical images (A) for the evaluation of the concentration of chromogens applied in the channel for the formation of Prussian Blue using standard solutions of Paracetamol at concentrations (i) 0; (ii) 20; (iii) 60 and (iv) 100 mg L<sup>-1</sup>, varying in proportions of the chromogens Fe (III) and Potassium hexacyanoferrate (III) within a concentration range of 5:5 - 10:10 mmol L<sup>-1</sup>. In (B), sensitivity values obtained for each proportion.

**Table S1.** Distance-based paracetamol detection recovery tests in  $\mu$ PADs.

| Added [Paracetamol] /<br>mg L <sup>-1</sup> (n=3) | Distance<br>(mm) | Found [Paracetamol] /<br>mg L <sup>-1</sup> | Recovery<br>(%) |
|---------------------------------------------------|------------------|---------------------------------------------|-----------------|
| 30                                                | 18.99 ± 0.44     | 29.8 ± 2.8                                  | 99.4            |
| 60                                                | 23.73 ± 0.28     | 59.8 ± 1.8                                  | 99.7            |
| 100                                               | 28.65 ± 0.29     | 91.0 ± 1.8                                  | 91.0            |

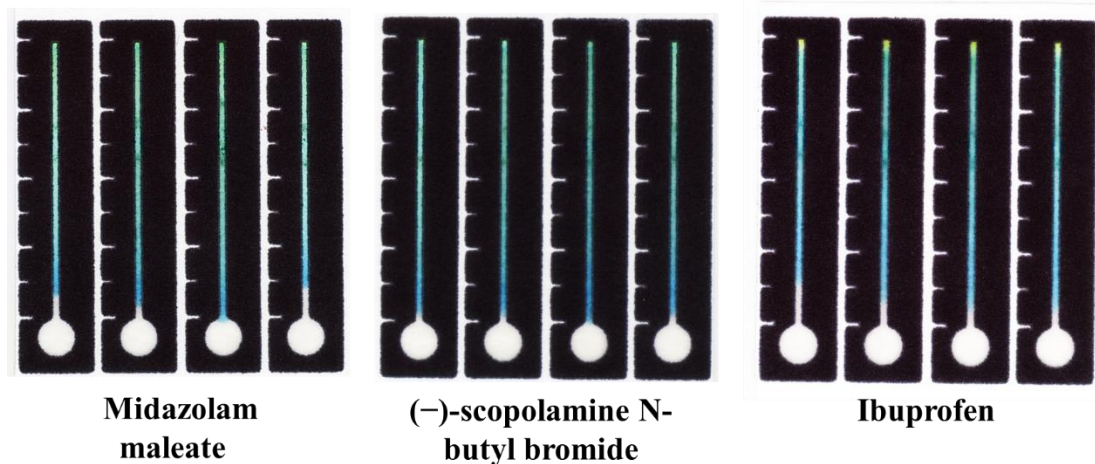**Fig. S3** Evaluation of interferents on devices for detecting paracetamol. 12  $\mu$ L was added to the sample zone containing 50 mg L<sup>-1</sup> of each interferent separately and was performed in quadruplicate.**Table S2.** Comparison of distance-based paracetamol detection in  $\mu$ PAD with the reference method.

| Samples | Added concentration<br>/ mg L <sup>-1</sup> | Found [Paracetamol] / mg L <sup>-1</sup> |                     | Relative error<br>(%) |
|---------|---------------------------------------------|------------------------------------------|---------------------|-----------------------|
|         |                                             | Proposed<br>method                       | Reference<br>method |                       |
| #1      | 0                                           | ND                                       | ND                  | -                     |
| #2      | 300                                         | 315.4 ± 15.8                             | 312.3 ± 1.4         | 1.0                   |
| #3      | 600                                         | 379.4 ± 11.7                             | 387.9 ± 5.7         | 2.2                   |
| #4      | 800                                         | 765.8 ± 63.3                             | 758.9 ± 0.8         | 4.4                   |
